# Supplementary material for: Tailored Triggering of High-Quality Multi-Dimensional Coupled Topological States in Valley Photonic Crystals
Source: MDPI journal article supplement (doi:10.3390/nano14100885), 2024-05-19
Supplement: s1 [file s1]

# ***Supplementary Materials for Tailored Triggering of High-quality Multi-dimensional Coupled Topological States in Valley Photonic Crystals***

*Guangxu Su<sup>1†</sup>, Jiangle He<sup>1†</sup>, Xiaofei Ye<sup>2</sup>, Hengming Yao<sup>1</sup>, Yaxuan Li<sup>1</sup>, Junzheng Hu<sup>2</sup>, Minghui Lu<sup>3\*</sup>, Peng Zhan<sup>2\*</sup> and Fanxin Liu<sup>1\*</sup>*

<sup>1</sup>Department of Applied Physics, Zhejiang University of Technology, Hangzhou 310023, China

<sup>2</sup>National Laboratory of Solid State Microstructures, Collaborative Innovation Center of Advanced Microstructures, School of Physics, Nanjing University, Nanjing 210093, China

<sup>3</sup>National Laboratory of Solid State Microstructures, Department of Materials Science and Engineering, Nanjing University, Jiangsu Key Laboratory of Artificial Functional Materials, Nanjing 210093, China

\* Corresponding author: [liufanxin@zjut.edu.cn](mailto:liufanxin@zjut.edu.cn), and [luminghui@nju.edu.cn](mailto:luminghui@nju.edu.cn), and [zhanpeng@nju.edu.cn](mailto:zhanpeng@nju.edu.cn).

**Fig. S1. Valley-momentum locking phenomenon of two edge states at the K' valley.**

**Fig. S2. Field distribution of different hybrid modes in transmission spectrum.**

**Fig. S3. Excitation of high-quality tunable multi-dimensional coupled topological states with LCP source.**

**Fig. S4. Robustness of multi-dimensional coupled topological states.**

**Fig. S5. Regulation of multi-dimensional coupled topological states with different coupling strength when the RCP source is at position 3.**

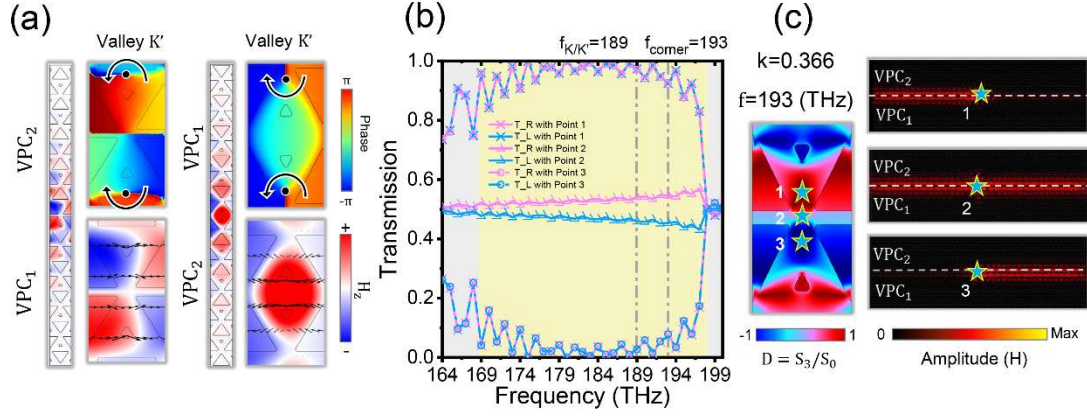

**Fig. S1. Valley-momentum locking phenomenon of two edge states at the K' valley.** (a) Valley-momentum locking properties of type I and type II VESs at K'-valley. (b) Normalized energy flow at the left or right ports when a LCP source is at positions 1, 2, and 3, respectively. (c) Positional dependence of the normalized Stokes  $S_3/S_0$  parameter at the interface, and the field distributions with the LCP source at positions 1, 2, and 3.

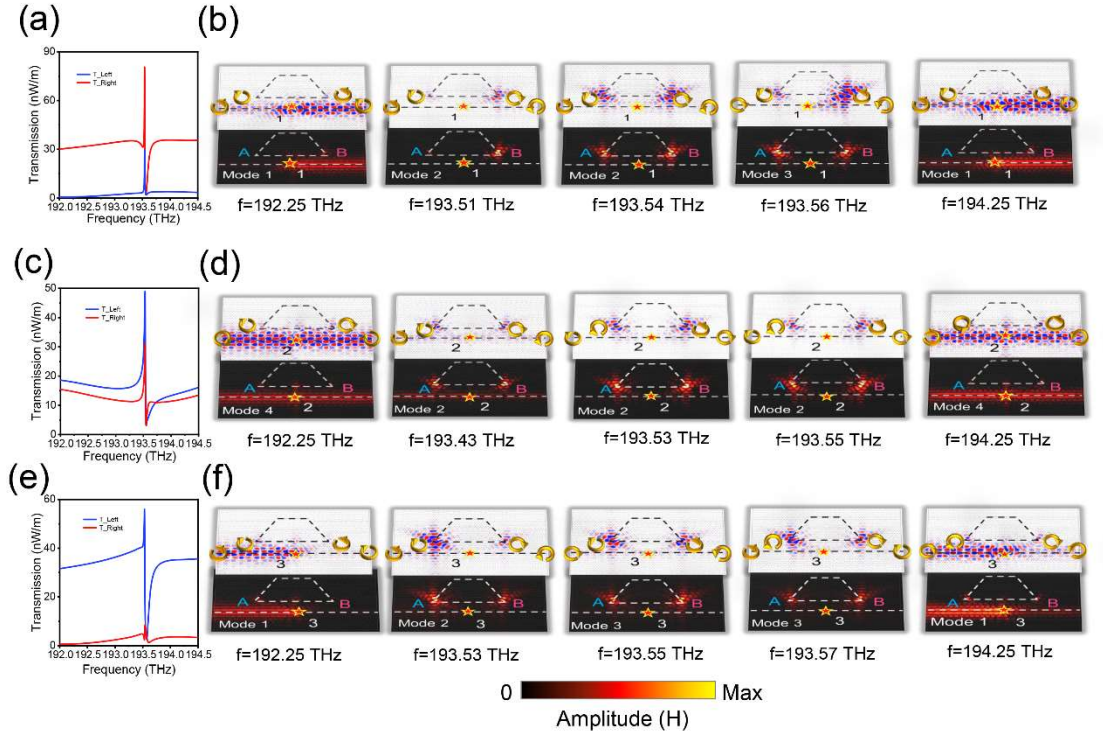

**Fig. S2. Field distribution of different hybrid modes in transmission spectrum.** (a-f)  $H$  and  $H_z$  distributions of modes at different frequencies in the transmission spectral line when the RCP source is at positions 1, 2, and 3, respectively, where the dark modes are  $Mode_2$  or  $Mode_3$  and the bright modes are  $Mode_1$  or  $Mode_4$ .

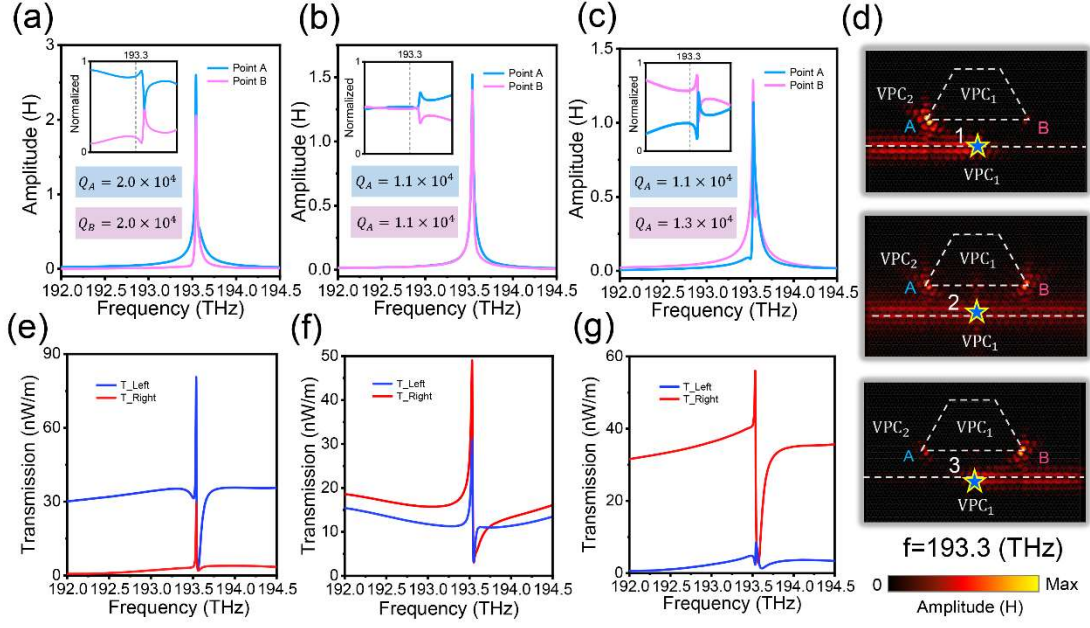

**Fig. S3. Excitation of high-quality tunable multi-dimensional coupled topological states with LCP source.** (a)-(c) Field intensity of the VCS nanocavities when the LCP source is at positions 1, 2, and 3, respectively, and the inset shows the normalized intensity at points A and B. (d) Field distributions of the LCP source at the 1, 2 and 3 positions, respectively. (e)-(f) Transmission spectra of the two ports of the waveguide when the LCP source is at positions 1, 2 and 3, respectively.

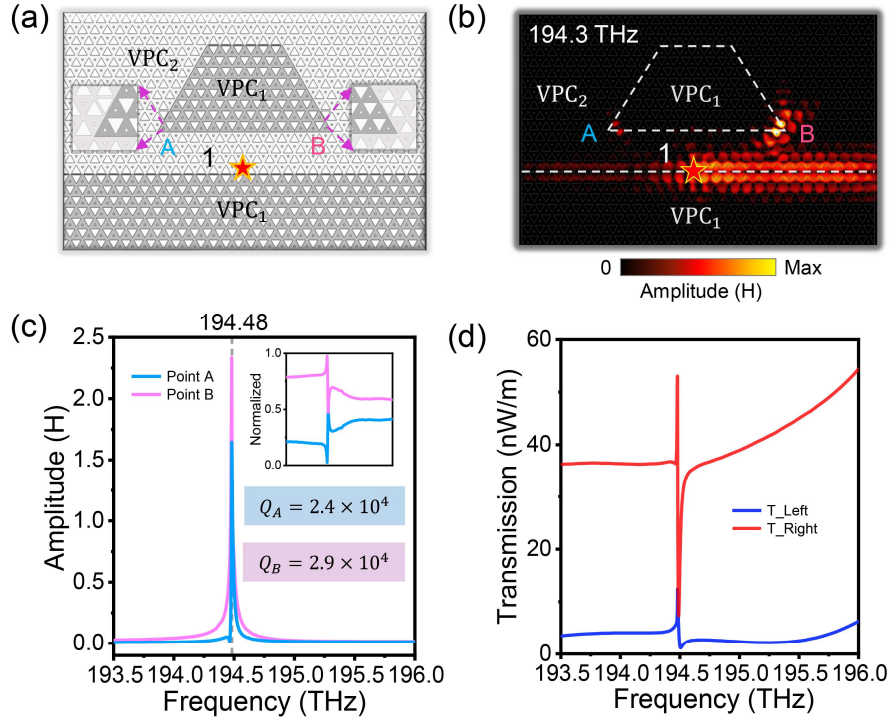

**Fig. S4. Robustness of multi-dimensional coupled topological states.** (a) Schematic of the structure, where a small triangular hole near the splicing corner is replaced by a large triangular hole as shown in the enlarged figure. (b) Field distribution of the multi-dimensional coupled topological states with defect. (c) Field intensity at points A or B, and the inset shows the normalized intensity. (d) Transmission spectrum at the left or right ports.

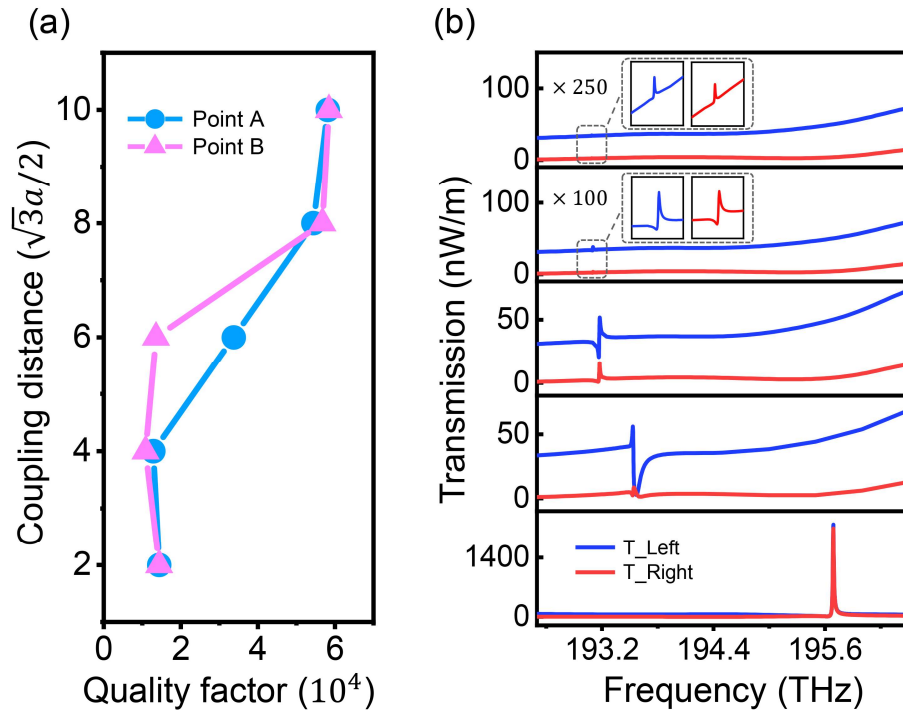

**Fig. S5. Regulation of multi-dimensional coupled topological states with different coupling strength when the RCP source is at position 3.** (a) and (b) Dependence of the quality factor and transmission spectrum of the structure with different coupling strength when the RCP source is at positions 3.
